# Supplementary material for: Microwave spectra, molecular geometries, and internal rotation of CH3 in N-methylimidazole⋯H2O and 2-methylimidazole⋯H2O Complexes
Source: Royal Society of Chemistry journal article supplement (doi:10.1039/d1cp05526g), 2022-01-01
Supplement: d1cp05526g31.pdf [file d1cp05526g31.pdf]

*Phys. Chem. Chem. Phys.*

## Supplementary Information

### Microwave Spectra, Molecular Geometries, and Internal Rotation of CH<sub>3</sub> in *N*-methylimidazole...H<sub>2</sub>O and 2-methylimidazole...H<sub>2</sub>O Complexes

Eva Gougoula,<sup>a</sup> Charlotte N. Cummings,<sup>b</sup> Chris Medcraft,<sup>c</sup> Juliane Heitkämper,<sup>b</sup> and  
Nicholas R. Walker<sup>b\*</sup>

<sup>a</sup> Deutsche Elektronen-Synchrotron (DESY), Notkestraße 85, D-22607 Hamburg.

<sup>b</sup> Chemistry- School of Natural and Environmental Sciences, Newcastle University,  
Bedson Building, Newcastle-upon-Tyne, NE1 7RU, UK

<sup>c</sup> School of Chemistry, UNSW Sydney, Sydney, New South Wales 2052, Australia.

KEYWORDS: rotational spectroscopy, internal rotation, imidazole, chirped-pulse,  
microwave.

AUTHOR INFORMATION

**Corresponding Author**

[\\*nick.walker@ncl.ac.uk](mailto:nick.walker@ncl.ac.uk)

**Table S1** – Atomic coordinates in the optimised geometries of *N*-MI...H<sub>2</sub>O and 2-MI...H<sub>2</sub>O calculated at the  $\omega$ B97X-D/aug-cc-pVQZ level.

| <i>N</i> -MI...H <sub>2</sub> O |             |             |             |
|---------------------------------|-------------|-------------|-------------|
|                                 | <i>a</i> /Å | <i>b</i> /Å | <i>c</i> /Å |
| N(1)                            | -1.357174   | -0.231787   | 0.008588    |
| C(2)                            | -0.099160   | -0.721263   | 0.062897    |
| H(2)                            | 0.107524    | -1.778352   | 0.101293    |
| N(3)                            | 0.796658    | 0.232451    | -0.061732   |
| C(4)                            | 0.087957    | 1.400243    | 0.001122    |
| H(4)                            | 0.576279    | 2.358912    | -0.015310   |
| C(5)                            | -1.247427   | 1.133689    | -0.033036   |
| H(5)                            | -2.110130   | 1.773649    | -0.079802   |
| C(6)                            | -2.581119   | -0.998193   | -0.035331   |
| H(6)                            | -2.347795   | -2.048243   | 0.119485    |
| H(6)                            | -3.260370   | -0.673033   | 0.750364    |
| H(6)                            | -3.070516   | -0.885539   | -1.001446   |
| H <sub>b</sub>                  | 2.669123    | -0.195381   | -0.034050   |
| O                               | 3.588113    | -0.506146   | -0.093761   |
| H <sub>nb</sub>                 | 3.997168    | -0.226173   | 0.722259    |
| <i>2</i> -MI...H <sub>2</sub> O |             |             |             |
|                                 | <i>a</i> /Å | <i>b</i> /Å | <i>c</i> /Å |
| N(1)                            | 1.610674    | -0.633079   | -0.001090   |
| H(1)                            | 2.201624    | -1.442578   | -0.005724   |
| C(2)                            | 0.254852    | -0.642298   | 0.012642    |
| N(3)                            | -0.207781   | 0.583735    | 0.014195    |
| C(4)                            | 0.886215    | 1.411753    | -0.001147   |
| H(4)                            | 0.782666    | 2.482594    | -0.005503   |
| C(5)                            | 2.027401    | 0.675993    | -0.010290   |
| H(5)                            | 3.066282    | 0.949231    | -0.020542   |
| C(6)                            | -0.560578   | -1.885871   | 0.004610    |
| H(6)                            | -1.606181   | -1.625183   | 0.146866    |
| H(6)                            | -0.463607   | -2.409208   | -0.947316   |
| H(6)                            | -0.254048   | -2.566814   | 0.798947    |
| H <sub>b</sub>                  | -2.110527   | 0.712036    | -0.029976   |
| O                               | -3.070668   | 0.553547    | -0.054869   |
| H <sub>nb</sub>                 | -3.426471   | 1.044396    | 0.682725    |

**Table S2** – Spectroscopic parameters of *N*-MI...H<sub>2</sub>O and 2-MI...H<sub>2</sub>O calculated at different levels of theory. The calculated rotational constants are appropriate to the equilibrium geometry whereas experimental results are for the zero-point state.

| <i>N</i> -MI...H <sub>2</sub> O              |                             |                    |                         |                    |
|----------------------------------------------|-----------------------------|--------------------|-------------------------|--------------------|
|                                              | $\omega$ B97X-D/aug-cc-pVQZ |                    | B3LYP(D3BJ)/aug-cc-pVTZ |                    |
| $A_e$ (MHz)                                  | 6111                        | +22 % <sup>a</sup> | 5744                    | +15 % <sup>a</sup> |
| $B_e$ (MHz)                                  | 1277                        | -9 %               | 1314                    | -7 %               |
| $C_e$ (MHz)                                  | 1067                        | -4 %               | 1080                    | -3 %               |
| $\chi_{aa}(N1)$ (MHz)                        | 1.37                        | +23 %              | 1.38                    | +24 %              |
| $[\chi_{bb}(N1) - \chi_{cc}(N1)]$ (MHz)      | 3.69                        | 0 %                | 3.86                    | +5 %               |
| $\chi_{aa}(N3)$ (MHz)                        | -4.00                       | +8 %               | -3.94                   | +7 %               |
| $[\chi_{bb}(N3) - \chi_{cc}(N3)]$ (MHz)      | -0.40                       | - <sup>b</sup>     | -0.14                   | - <sup>b</sup>     |
| $V_3$ (cm <sup>-1</sup> ) <sup>c</sup>       | 230                         | +21 %              | 185                     | +2 %               |
| $ \mu_a ,  \mu_b ,  \mu_c $ (D) <sup>b</sup> | 6.1, 0.1, 1.2               |                    | 5.9, 0, 1.2             |                    |
| 2-MI...H <sub>2</sub> O                      |                             |                    |                         |                    |
|                                              | $\omega$ B97X-D/aug-cc-pVQZ |                    | B3LYP(D3BJ)/aug-cc-pVTZ |                    |
| $A_e$ (MHz)                                  | 4198                        | -1 %               | 4183                    | -1 %               |
| $B_e$ (MHz)                                  | 1759                        | 2 %                | 1769                    | +2 %               |
| $C_e$ (MHz)                                  | 1252                        | 1 %                | 1256                    | +1 %               |
| $\chi_{aa}(N1)$ (MHz)                        | 1.24                        | -9 %               | 1.31                    | -4 %               |
| $[\chi_{bb}(N1) - \chi_{cc}(N1)]$ (MHz)      | 4.18                        | +1 %               | 4.24                    | +2 %               |
| $\chi_{aa}(N3)$ (MHz)                        | -3.37                       | 4 %                | -3.27                   | +1 %               |
| $[\chi_{bb}(N3) - \chi_{cc}(N3)]$ (MHz)      | -0.64                       | -4 %               | -0.44                   | -35 %              |
| $V_3$ (cm <sup>-1</sup> ) <sup>c</sup>       | 223                         | +30 %              | 173                     | +11 %              |
| $ \mu_a ,  \mu_b ,  \mu_c $ (D) <sup>d</sup> | 4.5, 1.8, 1.1               |                    | 4.4, 1.6, 1.0           |                    |

<sup>a</sup> Calculated as  $[(6111.37 \text{ MHz} - 5010.77) / 5010.77 \text{ MHz}] \times 100$  where 6111.37 MHz is the calculated  $A_e$  shown above, 5010.82 MHz is the result for  $A_0$  displayed in Table 1. A similar calculation is performed for percentages in other cells.

<sup>b</sup> Experimental results not available for  $[\chi_{bb}(N3) - \chi_{cc}(N3)]$  of *n*-MI...H<sub>2</sub>O.

<sup>c</sup> The  $V_3$  barrier to internal rotation was calculated by scanning the  $\angle(\text{H-C6-N1-C2})$  or  $\angle(\text{H-C6-C2-N3})$  dihedral angle as appropriate to each complex.

<sup>d</sup> Electric dipole moment components along the principal inertial axes.



**Table S3** – Spectroscopic parameters determined by fitting A-species transitions of *N*-MI...H<sub>2</sub>O.

|                                               | H <sub>2</sub> <sup>16</sup> O | H <sub>2</sub> <sup>18</sup> O | DOH                  | HOD                  | D <sub>2</sub> O     |
|-----------------------------------------------|--------------------------------|--------------------------------|----------------------|----------------------|----------------------|
| $A_0'$ (MHz)                                  | 5016.647(83) <sup>a</sup>      | 4979.14(17)                    | 5036.72(11)          | 4981.73(38)          | 5002.87(11)          |
| $B_0'$ (MHz)                                  | 1409.9245(26)                  | 1325.5593(63)                  | 1380.3348(32)        | 1351.4172(39)        | 1324.5280(39)        |
| $C_0'$ (MHz)                                  | 1107.2933(23)                  | 1052.8779(42)                  | 1089.9289(26)        | 1070.2048(39)        | 1054.3099(28)        |
| $D_j$ (kHz)                                   | 2.393(12)                      | 2.152(33)                      | 2.271(17)            | 2.065(64)            | 1.963(18)            |
| $D_{JK}$ (kHz)                                | -19.24(12)                     | -16.53(39)                     | -18.37(25)           | -12.0(26)            | -14.16(19)           |
| $d_1$ (kHz)                                   | -0.821(16)                     | -0.733(27)                     | -0.808(18)           | [-0.821]             | -0.692(17)           |
| $\chi_{aa}^{(N1)}$ (MHz)                      | 1.102(53)                      | 1.23(82)                       | 1.40(19)             | 1.6(11)              | 0.89(36)             |
| $[\chi_{bb}^{(N1)} - \chi_{cc}^{(N1)}]$ (MHz) | 3.69(26)                       | 3.33(80)                       | [3.69] <sup>b</sup>  | [3.69] <sup>b</sup>  | [3.69] <sup>b</sup>  |
| $\chi_{aa}^{(N3)}$ (MHz)                      | -3.694(43)                     | -3.67(22)                      | -3.81(26)            | -3.99(76)            | -3.65(13)            |
| $[\chi_{bb}^{(N3)} - \chi_{cc}^{(N3)}]$ (MHz) | [-0.40] <sup>c</sup>           | [-0.40] <sup>c</sup>           | [-0.40] <sup>c</sup> | [-0.40] <sup>c</sup> | [-0.40] <sup>c</sup> |
| $\sigma_{\text{RMS}}$ (kHz)                   | 22                             | 32                             | 19                   | 28                   | 20                   |
| $N$                                           | 66                             | 33                             | 23                   | 17                   | 26                   |

<sup>a</sup> Numbers in parentheses are one standard deviation in units of the last significant figure.

<sup>b</sup> Fixed equal to experimental result for *n*-MI...H<sub>2</sub><sup>16</sup>O.

<sup>c</sup>  $[\chi_{bb}^{(N3)} - \chi_{cc}^{(N3)}]$  fixed at result of  $\omega$ B97X-D/aug-cc-pVQZ calculation (Table S2) which is -0.40 MHz.

**Table S4**– Spectroscopic parameters determined by fitting A-species transitions of 2-MI...H<sub>2</sub>O

|                                         | H <sub>2</sub> <sup>16</sup> O | H <sub>2</sub> <sup>18</sup> O | DOH                  | HOD                  | D <sub>2</sub> O |
|-----------------------------------------|--------------------------------|--------------------------------|----------------------|----------------------|------------------|
| $A_0'$ (MHz)                            | 4238.327(41) <sup>a</sup>      | 4219.869(44)                   | 4216.661(46)         | 4188.097(48)         | 4169.345(36)     |
| $B_0'$ (MHz)                            | 1733.7666(11)                  | 1629.8925(14)                  | 1708.7911(18)        | 1662.8599(17)        | 1640.2022(13)    |
| $C_0'$ (MHz)                            | 1240.3151(12)                  | 1184.7889(18)                  | 1225.7117(17)        | 1200.1960(18)        | 1186.9046(16)    |
| $D_J$ (kHz)                             | 0.189(16)                      | 0.235(18)                      | 0.249(17)            | 0.322(13)            | 0.277(14)        |
| $D_{JK}$ (kHz)                          | 7.45(15)                       | 7.81(18)                       | 6.07(35)             | 6.90(17)             | 6.52(14)         |
| $\chi_{aa}(N1)$ (MHz)                   | 1.312(35)                      | 1.390(67)                      | 1.293(61)            | 1.258(76)            | 1.362(87)        |
| $[\chi_{bb}(N1) - \chi_{cc}(N1)]$ (MHz) | 4.11(10)                       | 3.92(26)                       | 3.98(21)             | 3.79(21)             | 4.14(26)         |
| $\chi_{aa}(N3)$ (MHz)                   | -3.282(78)                     | -3.12(10)                      | -3.120(62)           | -2.991(59)           | -3.247(67)       |
| $[\chi_{bb}(N3) - \chi_{cc}(N3)]$ (MHz) | [-0.67] <sup>b</sup>           | [-0.67] <sup>b</sup>           | [-0.67] <sup>b</sup> | [-0.67] <sup>b</sup> | -0.67(18)        |
| $\sigma_{\text{RMS}}$ (kHz)             | 18                             | 27                             | 23                   | 30                   | 24               |
| $N$                                     | 72                             | 65                             | 40                   | 60                   | 76               |

<sup>a</sup> Numbers in parentheses are one standard deviation in units of the last significant figure.

<sup>b</sup> The value of  $[\chi_{bb}(N3) - \chi_{cc}(N3)]$  of 2-MI...D<sub>2</sub>O is consistent with the calculated result (Table S3) and determined with reasonable precision. Values of  $[\chi_{bb}(N3) - \chi_{cc}(N3)]$  for all other isotopologues were not determined by the fits performed. For these reasons,  $[\chi_{bb}(N3) - \chi_{cc}(N3)]$  for 2-MI...H<sub>2</sub>O, 2-MI...H<sub>2</sub><sup>18</sup>O, 2-MI...DOH, 2-MI...HOD were fixed equal to the result for 2-MI...D<sub>2</sub>O.

**Table S5** – Nuclear quadrupole coupling constants in the principal nuclear axis framework. The  $\omega$ B97X-D/aug-cc-pVQZ results for *N*-MI...H<sub>2</sub>O and 2-MI...H<sub>2</sub>O are determined from the results for  $\chi_{aa}$  and  $[\chi_{bb} - \chi_{cc}]$  provided in Table S2. The results provided for imidazole are from D. Christen *et al.*, Z. Naturforsch. 1982, 37a, 1378.

|                       | $\omega$ B97X-D/aug-cc-pVQZ     |                         | Exp. (FTMW) |
|-----------------------|---------------------------------|-------------------------|-------------|
|                       | <i>N</i> -MI...H <sub>2</sub> O | 2-MI...H <sub>2</sub> O | Imidazole   |
| $\chi_{xx}(N1)$ (MHz) | 0.8600 <sup>a</sup>             | 1.1705 <sup>a</sup>     | 0.890(52)   |
| $\chi_{yy}(N1)$ (MHz) | 1.6797                          | 1.5385                  | 1.633(58)   |
| $\chi_{zz}(N1)$ (MHz) | -2.5397                         | -2.7091                 | -2.524(12)  |
| $\chi_{xx}(N3)$ (MHz) | 1.8256                          | 2.0059                  | 1.835(24)   |
| $\chi_{yy}(N3)$ (MHz) | 2.2058                          | 1.8991                  | 2.278(24)   |
| $\chi_{zz}(N3)$ (MHz) | -4.0314                         | -3.9050                 | -4.113(34)  |

<sup>a</sup>. Calculated using the QDIAG program available on the PROSPE website <<http://www.ifpan.edu.pl/~kisiel/prospe.htm>>.





**Table S6** Results of global (XIAM) fit of spectroscopic parameters to the frequencies of *A*- and *E*- species transitions of *n*-MI...H<sub>2</sub>O. Numbers in parentheses are one standard deviation in units of the last significant figure. The ordering of atoms within the 3<sup>rd</sup> and 4<sup>th</sup> column headers is H<sub>b</sub>OH<sub>n<sub>b</sub></sub> such that H<sub>b</sub> is deuterium for the isotopologue denoted as “DOH”. The value of  $F_0$  (157.929 MHz) is fixed to the result for the *N*-MI monomer available in ref. 9.  $N_A$  and  $N_E$  denote the number of *A*-species and *E* species transitions respectively included in the fit.

|                                | H <sub>2</sub> <sup>16</sup> O | H <sub>2</sub> <sup>18</sup> O | DOH           | HOD           | D <sub>2</sub> O |
|--------------------------------|--------------------------------|--------------------------------|---------------|---------------|------------------|
| $A_0$ (MHz)                    | 5010.78(21)                    | 4973.91(16)                    | 5030.91(18)   | 4976.11(29)   | 4997.19(16)      |
| $B_0$ (MHz)                    | 1409.5628(67)                  | 1325.2392(47)                  | 1379.9953(53) | 1351.0759(86) | 1324.2123(47)    |
| $C_0$ (MHz)                    | 1107.2884(60)                  | 1052.8660(35)                  | 1089.9214(47) | 1070.1983(53) | 1054.3030(38)    |
| $D_J$ (kHz)                    | 2.392(33)                      | 2.179(21)                      | 2.300(26)     | 2.024(61)     | 1.980(21)        |
| $D_{JK}$ (kHz)                 | -18.57(40)                     | -17.02(40)                     | -18.78(40)    | -10.9(18)     | -14.14(32)       |
| $d_1$ (kHz)                    | 0.820(42)                      | 0.780(22)                      | 0.832(31)     | 0.802(48)     | 0.721(21)        |
| $F_0$ (GHz)                    | [157.929]                      | [157.929]                      | [157.929]     | [157.929]     | [157.929]        |
| $V_3$ (cm <sup>-1</sup> )      | 182.23(10)                     | 182.41(7)                      | 182.29(8)     | 182.08(8)     | 182.37(8)        |
| $\angle(i, b)$ (°)             | 47.16(10)                      | 46.52(7)                       | 47.54(7)      | 46.81(8)      | 47.17(8)         |
| $\Delta_0$ (U Å <sup>2</sup> ) | -2.983(6)                      | -3.011(4)                      | -2.989(4)     | -3.388(7)     | -3.429(4)        |
| $\sigma_{\text{RMS}}$ (kHz)    | 50                             | 38                             | 31            | 21            | 36               |
| $N_A/N_E$                      | 26 / 19                        | 24 / 22                        | 15/12         | 11/8          | 19/19            |

**Table S7** Results of global (BELGI-C<sub>s</sub>) fit of spectroscopic parameters to the frequencies of A- and E- species transitions of N-MI...H<sub>2</sub>O. Rotational and centrifugal distortion constants calculated by XIAM and BELGI-C<sub>s</sub> are not directly comparable because the latter are calculated in the rho axis system. Numbers in parentheses are one standard deviation in units of the last significant figure. The ordering of atoms within the 3<sup>rd</sup> and 4<sup>th</sup> column headers is H<sub>b</sub>OH<sub>nb</sub> such that H<sub>b</sub> is deuterium for the isotopologue denoted as “DOH”. The value of F<sub>0</sub> of 157.929 GHz is fixed to the result for the n-MI monomer available in ref 9. N<sub>A</sub> and N<sub>E</sub> denote the number of A-species and E species transitions respectively included in the fit.

|                                    | H <sub>2</sub> <sup>16</sup> O | H <sub>2</sub> <sup>18</sup> O | DOH           | HOD           | D <sub>2</sub> O |
|------------------------------------|--------------------------------|--------------------------------|---------------|---------------|------------------|
| A <sub>0</sub> (MHz)               | 4768.6(59)                     | 4747.95(86)                    | 4800.7(54)    | 4753.9(24)    | 4779.6(21)       |
| B <sub>0</sub> (MHz)               | 1651.9(60)                     | 1550.91(87)                    | 1610.1(55)    | 1573.1(24)    | 1542.0(21)       |
| C <sub>0</sub> (MHz)               | 1107.3099(43)                  | 1052.8743(24)                  | 1089.9435(40) | 1070.1941(27) | 1054.2981(27)    |
| D <sub>J</sub> (kHz)               | 3.111(49)                      | 2.708(25)                      | 2.974(56)     | 2.369(42)     | 2.482(20)        |
| D <sub>JK</sub> (kHz)              | -20.6(5)                       | -18.1(4)                       | -20.1(7)      | -10.8(11)     | -15.5(3)         |
| d <sub>1</sub> (kHz)               | [0.959]                        | [0.959]                        | [0.959]       | [0.959]       | 0.959(17)        |
| F <sub>0</sub> (GHz)               | [157.929]                      | [157.929]                      | [157.929]     | [157.929]     | [157.929]        |
| V <sub>3</sub> (cm <sup>-1</sup> ) | 173.6(16)                      | 175.49(2)                      | 173.2(2)      | 177.1(7)      | 174.6(7)         |
| D <sub>AB</sub> (MHz)              | -902(10)                       | -878.9(16)                     | -887.2(99)    | -869.2(44)    | -867.4(41)       |
| ρ (unitless)                       | 0.0226(6)                      | [0.0228]                       | 0.0227(6)     | 0.0237(3)     | 0.0228(3)        |
| ∠(i, b) (°)                        | 46.3(3)                        | 46.06(3)                       | 46.6(4)       | 46.7(3)       | 46.6(3)          |
| σ <sub>RMS</sub> (kHz)             | 55                             | 27                             | 36            | 14            | 23               |
| N <sub>A</sub> /N <sub>E</sub>     | 26 / 19                        | 24 / 22                        | 15/12         | 11/8          | 19/19            |

**Table S8** Results of global (XIAM) fit of spectroscopic parameters to the frequencies of *A*- and *E*- species transitions of 2-MI...H<sub>2</sub>O. Numbers in parentheses are one standard deviation in units of the last significant figure. The ordering of atoms within the 3<sup>rd</sup> and 4<sup>th</sup> column headers is H<sub>b</sub>OH<sub>n<sub>b</sub></sub> such that H<sub>b</sub> is deuterium for the isotopologue denoted as “DOH”. The value of  $F_0$  (157.690 MHz) is fixed to the result for the 2-MI monomer available in ref 9.  $N_A$  and  $N_E$  denote the number of *A*-species and *E* species transitions respectively included in the fit.

|                                | H <sub>2</sub> <sup>16</sup> O | H <sub>2</sub> <sup>18</sup> O | DOH           | HOD           | D <sub>2</sub> O |
|--------------------------------|--------------------------------|--------------------------------|---------------|---------------|------------------|
| $A_0$ (MHz)                    | 4233.93(21)                    | 4216.088(93)                   | 4212.776(60)  | 4184.178(58)  | 4165.477(74)     |
| $B_0$ (MHz)                    | 1732.5621(61)                  | 1628.8335(43)                  | 1707.6301(27) | 1661.6617(20) | 1639.0453(25)    |
| $C_0$ (MHz)                    | 1240.3104(66)                  | 1184.7799(35)                  | 1225.7031(25) | 1200.1864(24) | 1186.8983(28)    |
| $D_J$ (kHz)                    | 0.233(81)                      | 0.248(33)                      | 0.250(28)     | 0.295(24)     | 0.246(27)        |
| $D_{JK}$ (kHz)                 | 7.28(78)                       | 7.51(37)                       | 6.11(60)      | 6.70(29)      | 6.61(35)         |
| $F_0$ (GHz)                    | [157.690]                      | [157.690]                      | [157.690]     | [157.690]     | [157.690]        |
| $V_3$ (cm <sup>-1</sup> )      | 154.99(8)                      | 156.02(12)                     | 156.07(4)     | 152.65(4)     | 153.57(4)        |
| $D_{\pi 2J}$ (kHz)             | -114(7)                        | -131(4)                        | -126(3)       | -128(2)       | -131(3)          |
| $\angle(i, b)$ (°)             | 36.55(6)                       | 36.07(8)                       | 36.20(6)      | 35.30(3)      | 34.86(3)         |
| $\Delta_0$ (U Å <sup>2</sup> ) | -3.60(3)                       | -3.580(3)                      | -3.599(2)     | -3.840(2)     | -3.865(2)        |
| $\sigma_{\text{RMS}}$ (kHz)    | 64                             | 34                             | 25            | 25            | 33               |
| $N_A/N_E$                      | 19 / 14                        | 21 / 10                        | 20 / 8        | 21 / 8        | 21 / 13          |

**Table S9** Results of global (BELGI-C<sub>s</sub>) fit of spectroscopic parameters to the frequencies of *A*- and *E*- species transitions of 2-MI...H<sub>2</sub>O. Rotational and centrifugal distortion constants calculated by XIAM and BELGI-C<sub>s</sub> are not directly comparable because the latter are calculated in the rho axis system. Numbers in parentheses are one standard deviation in units of the last significant figure. The ordering of atoms within the 3<sup>rd</sup> and 4<sup>th</sup> column headers is H<sub>b</sub>OH<sub>nb</sub> such that H<sub>b</sub> is deuterium for the isotopologue denoted as “DOH”. The value of  $F_0$  of 157.690 GHz is fixed to the result for the 2-MI monomer available in ref 9.  $N_A$  and  $N_E$  denote the number of *A*-species and *E* species transitions respectively included in the fit.

|                             | H <sub>2</sub> <sup>16</sup> O | H <sub>2</sub> <sup>18</sup> O | DOH           | HOD         | D <sub>2</sub> O |
|-----------------------------|--------------------------------|--------------------------------|---------------|-------------|------------------|
| $A_0$ (MHz)                 | 3649.9(35)                     | 3646.5(58)                     | 3630.8(50)    | 3649.9(35)  | 3574.2(95)       |
| $B_0$ (MHz)                 | 2314.3(35)                     | 2196.0(59)                     | 2287.2(49)    | 2314.3(35)  | 2228.4(93)       |
| $C_0$ (MHz)                 | 1238.69(17)                    | 1183.21(11)                    | 1224.4359(22) | 1238.69(17) | 1185.74(22)      |
| $D_J$ (kHz)                 | [0.233]                        | [0.248]                        | [0.250]       | [0.295]     | [0.246]          |
| $D_{JK}$ (kHz)              | 4.33(71)                       | 4.77(74)                       | 2.11(55)      | 3.09(87)    | 2.87(80)         |
| $F_0$ (GHz)                 | [157.690]                      | [157.690]                      | [157.690]     | [157.690]   | [157.690]        |
| $V_3$ (cm <sup>-1</sup> )   | 150.68(89)                     | 152.58(11)                     | 155.5(24)     | 153.4(30)   | 155.5(23)        |
| $D_{ab}$ (MHz)              | -1058.0(23)                    | -1071.6(39)                    | -1057.3(32)   | -1068.4(62) | -1069.3(59)      |
| $F_v$ (MHz)                 | 5.49(60)                       | 5.36(40)                       | 4.35(73)      | 4.07(96)    | 3.92(76)         |
| $\rho$ (unitless)           | 0.01799(28)                    | [0.0178]                       | 0.01890(7)    | 0.01883(94) | 0.01898(76)      |
| $\angle(i, b)$ (°)          | 36.56(5)                       | 36.03(14)                      | 36.41(6)      | 35.66(11)   | 35.46(11)        |
| $\sigma_{\text{RMS}}$ (kHz) | 79                             | 79                             | 42            | 84          | 76               |
| $N_A/N_E$                   | 19/14                          | 21/10                          | 20/8          | 21/8        | 21/13            |

**Table S10** – DFT calculated ( $r_e$ ) and experimentally-determined ( $r_0$ ,  $r_s$ ) atomic coordinates of H<sub>2</sub>O in the complexes *N*-MI...H<sub>2</sub>O and 2-MI...H<sub>2</sub>O

| <i>N</i> -MI...H <sub>2</sub> O |               |                        |                  |              |
|---------------------------------|---------------|------------------------|------------------|--------------|
|                                 | Method        | $a/\text{Å}$           | $b/\text{Å}$     | $c/\text{Å}$ |
| H <sub>b</sub>                  | $r_e$ (calc.) | 2.6691                 | -0.1954          | -0.0341      |
|                                 | $r_s$ (exp.)  | 2.7785(8) <sup>b</sup> | [0] <sup>c</sup> | 0.05(4)      |
|                                 | $r_0$ (exp.)  | 2.565(20) <sup>b</sup> | -0.21(5)         | [0]          |
| O                               | $r_e$ (calc.) | 3.5881                 | -0.5061          | -0.0938      |
|                                 | $r_s$ (exp.)  | 3.4036(5)              | -0.650(3)        | [0]          |
|                                 | $r_0$ (exp.)  | 3.430(5)               | -0.6229(7)       | [0]          |
| H <sub>nb</sub>                 | $r_e$ (calc.) | 3.9972                 | -0.2262          | 0.7223       |
|                                 | $r_s$ (exp.)  | 3.9163(7)              | -0.728(4)        | 0.462(6)     |
|                                 | $r_0$ (exp.)  | 4.05(4)                | -0.11(4)         | [0]          |
| <i>2</i> -MI...H <sub>2</sub> O |               |                        |                  |              |
|                                 | Method        | $a/\text{Å}$           | $b/\text{Å}$     | $c/\text{Å}$ |
| H <sub>b</sub>                  | $r_e$ (calc.) | 2.1105                 | -0.7120          | -0.0300      |
|                                 | $r_s$ (exp.)  | 2.064(1)               | -0.784(3)        | 0.03(7)      |
|                                 | $r_0$ (exp.)  | 2.143(3)               | -0.69(3)         | [0]          |
| O                               | $r_e$ (calc.) | 3.0707                 | -0.5535          | -0.0549      |
|                                 | $r_s$ (exp.)  | 3.0709(6)              | -0.538(3)        | [0]          |
|                                 | $r_0$ (exp.)  | 3.088(3)               | -0.5219(11)      | [0]          |
| H <sub>nb</sub>                 | $r_e$ (calc.) | 3.4265                 | -1.0444          | 0.6827       |
|                                 | $r_s$ (exp.)  | 3.5032(6)              | -1.181(2)        | 0.359(6)     |
|                                 | $r_0$ (exp.)  | 3.48(3)                | -1.396(14)       | [0]          |

<sup>a</sup>  $r_e$  geometries are calculated at the  $\omega$ B97XD/aug-cc-pVQZ level.

<sup>b</sup> Numbers in parentheses are Costain errors for  $r_s$  results and one standard deviation in units of the last significant figure for  $r_0$  results.

<sup>c</sup> Imaginary values were obtained for those  $r_s$  coordinates indicated in square brackets which are assumed equal to zero.

<sup>d</sup> The assumed values of the dihedral angles,  $\angle(\text{H}_b\dots\text{N3-C2-N1}) = 180^\circ$ ,  $\angle(\text{O-H}_b\dots\text{N3-C2}) = 0^\circ$  and  $\angle(\text{H}_{nb}\text{-O-H}_b\dots\text{N3}) = 180^\circ$  lead to  $|c| = 0$  for H<sub>b</sub>, O and H<sub>nb</sub> of each complex.

**Table S11** –Atomic coordinates of *N*-MI...H<sub>2</sub>O and 2-MI...H<sub>2</sub>O determined by the *r*<sub>0</sub> method while assuming that  $\angle(\text{H}_{\text{nb}}-\text{O}-\text{H}_b\cdots\text{N3}) = 180^\circ$  and  $\angle(\text{O}-\text{H}_b\cdots\text{N3}-\text{C2}) = 0^\circ$  for each complex (see text for details).

| <i>N</i> -MI...H <sub>2</sub> O |                           |                |             |
|---------------------------------|---------------------------|----------------|-------------|
|                                 | <i>a</i> /Å               | <i>b</i> /Å    | <i>c</i> /Å |
| N(1)                            | -1.26246(97) <sup>a</sup> | -0.30300(121)  | 0.00001(0)  |
| C(2)                            | 0.04860(161)              | -0.57609(195)  | 0.00105(0)  |
| H(2)                            | 0.49485(396)              | -1.55826(303)  | 0.00237(1)  |
| N(3)                            | 0.79263(115)              | 0.53411(375)   | 0.00185(0)  |
| C(4)                            | -0.11852(361)             | 1.56402(155)   | 0.00028(0)  |
| H(4)                            | 0.18821(609)              | 2.59694(229)   | -0.00055(1) |
| C(5)                            | -1.41824(239)             | 1.05856(159)   | -0.00148(0) |
| H(5)                            | -2.28981(392)             | 1.69380(369)   | -0.00267(1) |
| C(6)                            | -2.30775(336)             | -1.31081(374)  | -0.00030(0) |
| H(6)                            | -2.93233(310)             | -1.19984(525)  | -0.88669(0) |
| H(6)                            | -1.86523(576)             | -2.30690(267)  | -0.00933(1) |
| H(6)                            | -2.92152(312)             | -1.21160(521)  | 0.89499(0)  |
| H <sub>b</sub>                  | 2.56475(1963)             | -0.21032(5031) | -0.00010(4) |
| O                               | 3.43023(487)              | -0.62292(66)   | -0.00112(0) |
| H <sub>nb</sub>                 | 4.04639(3856)             | 0.11168(3688)  | -0.00066(0) |
| 2-MI...H <sub>2</sub> O         |                           |                |             |
|                                 | <i>a</i> /Å               | <i>b</i> /Å    | <i>c</i> /Å |
| N(1)                            | -1.65447(94)              | -0.62524(175)  | -0.00077(0) |
| H(1)                            | -2.25903(221)             | -1.41928(272)  | 0.00017(0)  |
| C(2)                            | -0.29042(98)              | -0.65153(46)   | -0.00002(0) |
| N(3)                            | 0.22479(102)              | 0.55671(129)   | 0.00174(0)  |
| C(4)                            | -0.86404(238)             | 1.40814(47)    | 0.00116(0)  |
| H(4)                            | -0.73153(411)             | 2.47745(26)    | 0.00452(0)  |
| C(5)                            | -2.02952(124)             | 0.69991(235)   | -0.00185(0) |
| H(5)                            | -3.06368(173)             | 1.00598(402)   | -0.00134(0) |
| C(6)                            | 0.57333(294)              | -1.87203(186)  | 0.00078(0)  |
| H(6)                            | 0.37230(391)              | -2.47159(153)  | -0.88703(0) |
| H(6)                            | 1.62476(247)              | -1.58465(356)  | 0.00294(1)  |
| H(6)                            | 0.36899(390)              | -2.47277(153)  | 0.88704(0)  |
| H <sub>b</sub>                  | 2.14337(298)              | 0.68539(3005)  | 0.00000(5)  |
| O                               | 3.08813(262)              | 0.52193(108)   | -0.00129(0) |
| H <sub>nb</sub>                 | 3.48294(2605)             | 1.39567(1369)  | -0.00004(5) |

<sup>a</sup> Results are output from fit performed using Kisiel's STRFIT. Numbers in parentheses are one standard deviation in units of the last significant figure.

**Table S12** – Computed values of  $\Delta B_{vib}^i$  and  $B_e^i$  for  $N\text{-MI}\dots\text{H}_2\text{O}$ .

See text for definitions of  $B_0^i$ ,  $\Delta B_{vib}^i$  and  $B_e^i$ . Values of  $B_0^i$  rotational constants are as shown in Table S6 ( $a$ ,  $b$  and  $c$  denote the respective inertial axes). Values of  $\Delta B_{vib}^i$  are computed by density functional theory using the B3LYP functional, the partially-augmented double- $\zeta$  jun-cc-pVDZ basis set and Grimme's DFT-D3 scheme with the Becke-Johnson (BJ) damping function for the treatment of dispersion effects. Values of  $B_e^i$  are determined by subtracting  $\Delta B_{vib}^i$  from  $B_0^i$  according to the equation shown (Eqn 3 in the text).

$$B_e^i = B_0^i - \Delta B_{vib}^i = B_0^i + \frac{1}{2} \sum_r \alpha_r^i$$

|                     | $N\text{-MI}\dots\text{H}_2^{16}\text{O}$ |               |               | $N\text{-MI}\dots\text{H}_2^{18}\text{O}$ |               |               |
|---------------------|-------------------------------------------|---------------|---------------|-------------------------------------------|---------------|---------------|
|                     | $a$                                       | $b$           | $c$           | $a$                                       | $b$           | $c$           |
| $B_0^i$             | 5010.78(21)                               | 1409.5628(67) | 1107.2884(60) | 4973.91(16)                               | 1325.2392(47) | 1052.8660(35) |
| $\sum_r \alpha_r^i$ | -48.863                                   | 20.67419      | 19.17657      | -57.417                                   | 20.42193      | 18.62950      |
| $-\Delta B_{vib}^i$ | -24.431                                   | 10.33710      | 9.58829       | -28.709                                   | 10.21097      | 9.31475       |
| $B_e^i$             | 4986.34(21)                               | 1419.8999(67) | 1116.8767(60) | 4945.20(16)                               | 1335.4502(47) | 1062.1808(35) |
|                     | $N\text{-MI}\dots\text{DOH}$              |               |               | $N\text{-MI}\dots\text{HOD}$              |               |               |
|                     | $A$                                       | $b$           | $c$           | $a$                                       | $b$           | $c$           |
| $B_0^i$             | 5030.91(18)                               | 1379.9953(53) | 1089.9214(47) | 4976.11(29)                               | 1351.0759(86) | 1070.1983(53) |
| $\sum_r \alpha_r^i$ | 54.382                                    | 8.29807       | 14.28911      | 18.336                                    | 12.29522      | 15.52354      |
| $-\Delta B_{vib}^i$ | 27.191                                    | 4.14904       | 7.14456       | 9.168                                     | 6.14761       | 7.76177       |
| $B_e^i$             | 5058.10(18)                               | 1384.1443(53) | 1097.0660(47) | 4985.28(29)                               | 1357.2235(86) | 1077.9601(53) |
|                     | $N\text{-MI}\dots\text{D}_2\text{O}$      |               |               |                                           |               |               |
|                     | $a$                                       | $b$           | $c$           |                                           |               |               |
| $B_0^i$             | 4997.19(16)                               | 1324.2123(47) | 1054.3030(38) |                                           |               |               |
| $\sum_r \alpha_r^i$ | 36.355                                    | 9.26088       | 14.21856      |                                           |               |               |
| $-\Delta B_{vib}^i$ | 18.178                                    | 4.63044       | 7.10928       |                                           |               |               |
| $B_e^i$             | 5015.37(16)                               | 1328.8427(47) | 1061.4123(38) |                                           |               |               |

**Table S13** – Computed values of  $\Delta B_{vib}^i$  and  $B_e^i$  for 2-MI...H<sub>2</sub>O.

See text for definitions of  $B_0^i$ ,  $\Delta B_{vib}^i$  and  $B_e^i$ . Values of  $B_0^i$  rotational constants are as shown in Table S8 ( $a$ ,  $b$  and  $c$  denote the respective inertial axes). Values of  $\Delta B_{vib}^i$  are computed by density functional theory using the B3LYP functional, the partially-augmented double- $\zeta$  jun-cc-pVDZ basis set and Grimme's DFT-D3 scheme with the Becke-Johnson (BJ) damping function for the treatment of dispersion effects. Values of  $B_e^i$  are determined by subtracting  $\Delta B_{vib}^i$  from  $B_0^i$  according to the equation shown (Eqn 3 in the text).

$$B_e^i = B_0^i - \Delta B_{vib}^i = B_0^i + \frac{1}{2} \sum_r \alpha_r^i$$

|                     | 2-MI...H <sub>2</sub> <sup>16</sup> O |               |               | 2-MI...H <sub>2</sub> <sup>18</sup> O |               |               |
|---------------------|---------------------------------------|---------------|---------------|---------------------------------------|---------------|---------------|
|                     | <i>a</i>                              | <i>b</i>      | <i>c</i>      | <i>a</i>                              | <i>b</i>      | <i>c</i>      |
| $B_0^i$             | 4233.93(21)                           | 1732.5621(61) | 1240.3104(66) | 4216.088(93)                          | 1628.8335(43) | 1184.7799(35) |
| $\sum_r \alpha_r^i$ | 157.024                               | 31.30892      | 30.74646      | 160.0268                              | 30.22398      | 29.87129      |
| $-\Delta B_{vib}^i$ | 78.512                                | 15.65446      | 15.37323      | 80.0134                               | 15.11199      | 14.93565      |
| $B_e^i$             | 4312.44(21)                           | 1748.2166(61) | 1255.6836(66) | 4296.101(93)                          | 1643.9455(43) | 1199.7155(35) |
|                     | 2-MI...DOH                            |               |               | 2-MI...HOD                            |               |               |
|                     | <i>a</i>                              | <i>b</i>      | <i>c</i>      | <i>a</i>                              | <i>b</i>      | <i>c</i>      |
| $B_0^i$             | 4212.776(60)                          | 1707.6301(27) | 1225.7031(25) | 4184.178(58)                          | 1661.6617(20) | 1200.1864(24) |
| $\sum_r \alpha_r^i$ | 131.60096                             | 27.55827      | 27.13067      | 160.6056                              | 29.0206       | 29.72541      |
| $-\Delta B_{vib}^i$ | 65.80048                              | 13.77914      | 13.56534      | 80.3028                               | 14.5103       | 14.86271      |
| $B_e^i$             | 4278.576(60)                          | 1721.4092(27) | 1239.2684(25) | 4264.481(58)                          | 1676.1720(20) | 1215.0491(24) |
|                     | 2-MI...D <sub>2</sub> O               |               |               |                                       |               |               |
|                     | <i>a</i>                              | <i>b</i>      | <i>c</i>      |                                       |               |               |
| $B_0^i$             | 4165.477(74)                          | 1639.0453(25) | 1186.8983(28) |                                       |               |               |
| $\sum_r \alpha_r^i$ | 133.82315                             | 25.01936      | 25.77635      |                                       |               |               |
| $-\Delta B_{vib}^i$ | 66.9116                               | 12.50968      | 12.88818      |                                       |               |               |
| $B_e^i$             | 4232.389(74)                          | 1651.5550(25) | 1199.7865(28) |                                       |               |               |
